# Supplementary material
Source: MDPI journal article supplement (https://www.mdpi.com/2076-3417/11/14/6601)
Supplement: s1 [file s1]

## Supporting Information

for

### Effects of Workers Exposure to Nanoparticles Studied by NMR Metabolomics

Štěpán Horník<sup>1,2</sup>, Lenka Michálková<sup>1,2</sup>, Jan Sýkora<sup>1,\*</sup>, Vladimír Ždímal<sup>1</sup>, Štěpánka Vlčková<sup>3</sup>, Štěpánka Dvořáčková<sup>4</sup>, Daniela Pelclová<sup>3,\*</sup>

<sup>1</sup> Institute of Chemical Process Fundamentals of the CAS, Rozvojová 1/135, 165 02 Prague, Czech Republic

<sup>2</sup> Department of Analytical Chemistry, University of Chemistry and Technology Prague, 166 28 Prague, Czech Republic

<sup>3</sup> Department of Occupational Medicine, First Faculty of Medicine, Charles University in Prague and General University Hospital in Prague Na Bojišti 1, 128 00 Prague, Czech Republic

<sup>4</sup> Department of Machining and Assembly, Department of Engineering Technology, Department of Material Science, Faculty of Mechanical Engineering, Technical University in Liberec, Studentska 1402/2, 461 17 Liberec, Czech Republic.

\*Corresponding Author: Dr. Jan Sýkora ([sykora@icpf.cas.cz](mailto:sykora@icpf.cas.cz))

## Content

|                                                                                               |     |
|-----------------------------------------------------------------------------------------------|-----|
| Basic characteristics of the samples .....                                                    | S2  |
| Representative <sup>1</sup> H NMR spectra .....                                               | S4  |
| Wilcoxon test for EBC samples .....                                                           | S5  |
| Principal component analysis for EBC samples .....                                            | S5  |
| Principal component analysis for blood plasma samples .....                                   | S6  |
| Wilcoxon test for blood plasma samples .....                                                  | S6  |
| Fold change projection .....                                                                  | S8  |
| Metabolic pathway analysis .....                                                              | S10 |
| Wilcoxon test for EBC samples after exclusion of smoking subjects .....                       | S12 |
| Wilcoxon test for blood plasma samples after exclusion of smoking subjects .....              | S12 |
| Multivariate statistical analysis of EBC samples after exclusion of smoking subjects .....    | S14 |
| Multivariate statistical analysis of plasma samples after exclusion of smoking subjects ..... | S15 |

**Table S1.** Basic characteristics of the samples studied. Data are reported as mean  $\pm$  standard deviation, or count.

|                              |          | pre-shift<br>(n=20) | post-shift<br>(n=20) | control<br>(n=20) |
|------------------------------|----------|---------------------|----------------------|-------------------|
| age                          | years    | 41.8 $\pm$ 11.3     |                      | 43.3 $\pm$ 11.5   |
| female                       |          | 5                   |                      | 7                 |
| male                         |          | 15                  |                      | 13                |
| working with NPs             | years    | 6.5 $\pm$ 3.9       |                      | -                 |
| daily exposure               | h/day    | 1.7 $\pm$ 1.0       |                      | -                 |
| exposure on the sampling day | min      | 156.3 $\pm$ 61.9    |                      | -                 |
| weight                       | kg       | 87.5 $\pm$ 23.0     |                      | 77.7 $\pm$ 16.7   |
| height                       | cm       | 176.1 $\pm$ 9.9     |                      | 175.7 $\pm$ 8.8   |
| BMI                          | kg/m2    | 28.0 $\pm$ 6.2      |                      | 25.1 $\pm$ 4.8    |
| alcohol consumption          | Yes : No | 18 : 2              |                      | 17 : 3            |
| smoking                      | Yes : No | 1 : 19              |                      | 2 : 18            |
| physical activity            | Yes : No | 15 : 5              |                      | 13 : 7            |
| medication                   | Yes : No | 9 : 11              |                      | 8 : 12            |
| Letrox (thyroid hormone)     | Yes : No | 2 : 18              |                      | 1 : 19            |
| Tulip (statin)               | Yes : No | 1 : 19              |                      | 1 : 19            |
| Vit E                        | Yes : No | 0 : 20              |                      | 2 : 18            |
| Warfarin (anticoagulant)     | Yes : No | 0 : 20              |                      | 1 : 19            |
| Antihypertensives            | Yes : No | 5 : 15              |                      | 3 : 17            |
| Vit B                        | Yes : No | 2 : 18              |                      | 2 : 18            |
| Vit C                        | Yes : No | 4 : 16              |                      | 1 : 19            |
| bronchial pneumonia          | Yes : No | 15 : 5              |                      | 10 : 10           |
| hypothyroidism               | Yes : No | 3 : 17              |                      | 2 : 18            |
| cardiac arrhythmia           | Yes : No | 2 : 18              |                      | 1 : 19            |
| hypertension                 | Yes : No | 10 : 10             |                      | 6 : 14            |
| hypercholesterolemia         | Yes : No | 5 : 15              |                      | 3 : 17            |
| gout                         | Yes : No | 2 : 18              |                      | 1 : 19            |
| urinary tract infection      | Yes : No | 4 : 16              |                      | 4 : 16            |
| factor V Leiden              | Yes : No | 1 : 19              |                      | 0 : 20            |
| hyperbilirubinemia           | Yes : No | 3 : 17              |                      | 0 : 20            |
| asthma                       | Yes : No | 1 : 19              |                      | 1 : 19            |
| allergic rhinitis            | Yes : No | 9 : 11              |                      | 9 : 11            |
| cough                        | Yes : No | 5 : 15              |                      | 1 : 19            |
| shortness of breath          | Yes : No | 2 : 18              |                      | 0 : 20            |
| cold                         | Yes : No | 1 : 19              |                      | 1 : 19            |
| FVC                          | L        | 4.33 $\pm$ 1.02     | 4.33 $\pm$ 0.91      | 4.38 $\pm$ 1.05   |
| FEV                          | L        | 3.19 $\pm$ 0.95     | 3.73 $\pm$ 0.81      | 3.85 $\pm$ 0.98   |
| LTB4                         | pg/mL    | 36.2 $\pm$ 11.5     | 36.0 $\pm$ 11.0      | 26.2 $\pm$ 6.8    |
| LTD4                         | pg/mL    | 30.0 $\pm$ 5.1      | 27.2 $\pm$ 4.0       | 26.3 $\pm$ 3.4    |
| LTE4                         | pg/mL    | 39.0 $\pm$ 7.3      | 39.9 $\pm$ 7.7       | 34.5 $\pm$ 5.7    |
| LXB4                         | pg/mL    | 59.2 $\pm$ 4.1      | 60.3 $\pm$ 6.8       | 64.5 $\pm$ 4.3    |
| IL 9                         | pg/mL    | 14.7 $\pm$ 1.0      | 15.9 $\pm$ 1.4       | 16.3 $\pm$ 1.4    |
| IL 10                        | pg/mL    | 33.9 $\pm$ 2.2      | 36.2 $\pm$ 2.8       | 35.0 $\pm$ 2.8    |
| MDA                          | ng/mL    | 23.3 $\pm$ 6.1      | 28.0 $\pm$ 9.4       | 18.5 $\pm$ 4.6    |

|                                  |       | pre-shift<br>(n=20) | post-shift<br>(n=20) | control<br>(n=20) |
|----------------------------------|-------|---------------------|----------------------|-------------------|
| HNE                              | ng/mL | 15.3 ± 5.2          | 27.7 ± 11.7          | 19.7 ± 5.2        |
| HHE                              | ng/mL | 18.9 ± 6.0          | 26.8 ± 12.8          | 20.8 ± 4.4        |
| C6-C13 aldehydes (even no. of C) | ng/mL | 4.4 ± 3.4           | 5.0 ± 3.6            | 2.2 ± 1.0         |
| C6-C13 aldehydes (odd no. of C)  | ng/mL | 6.2 ± 3.7           | 6.6 ± 4.3            | 3.1 ± 1.3         |
| 8-isoprostane                    | pg/mL | 32.2 ± 11.2         | 33.4 ± 11.8          | 25.2 ± 5.8        |
| 8-OHdG                           | pg/mL | 28.8 ± 7.1          | 29.0 ± 6.4           | 21.5 ± 7.5        |
| 8-OHG                            | pg/mL | 37.1 ± 11.6         | 37.2 ± 11.5          | 21.2 ± 9.1        |
| 5-OHMeU                          | pg/mL | 28.0 ± 6.5          | 26.9 ± 5.9           | 20.7 ± 6.2        |
| o-Tyr                            | pg/mL | 32.1 ± 9.6          | 32.2 ± 9.3           | 23.3 ± 8.4        |
| 3-ClTyr                          | pg/mL | 33.8 ± 10.6         | 33.6 ± 10.3          | 24.0 ± 7.2        |
| NOTyr                            | pg/mL | 58.6 ± 10.3         | 58.0 ± 9.7           | 52.8 ± 7.6        |

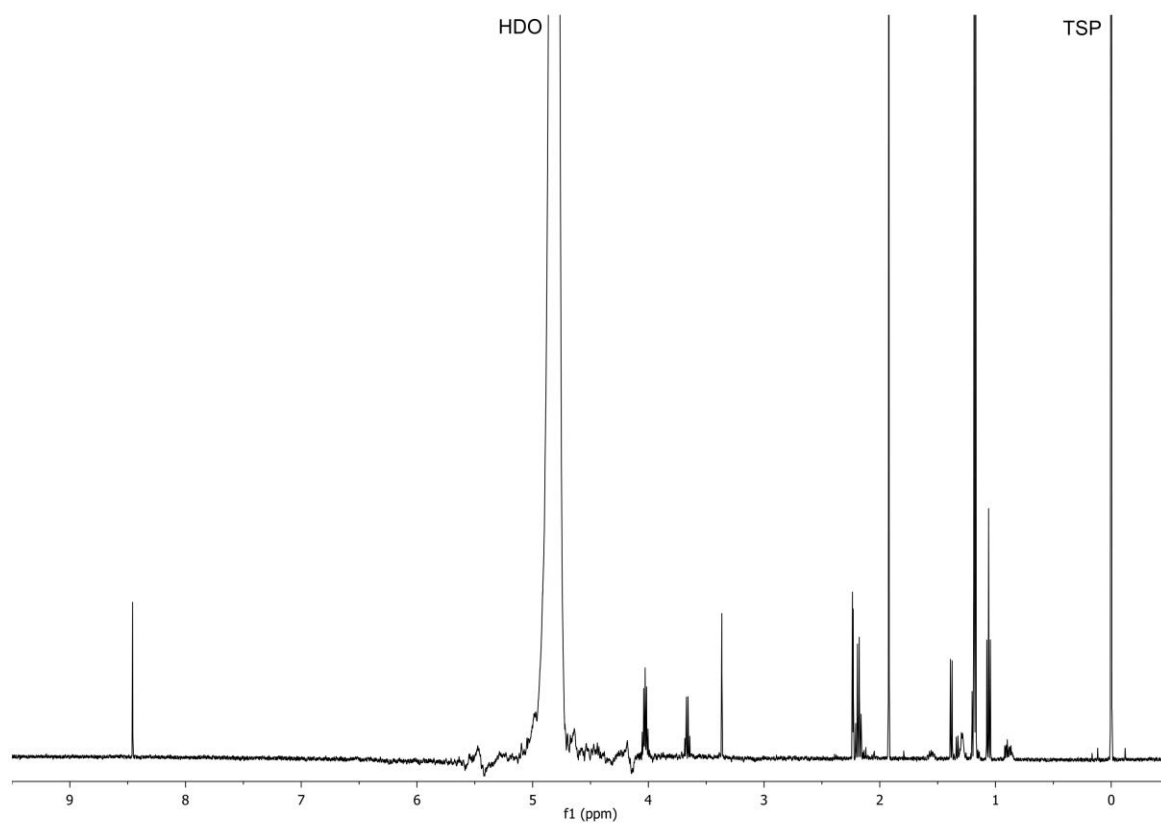

**Figure S1.**  $^1\text{H}$  NMR spectrum of a representative EBC sample.

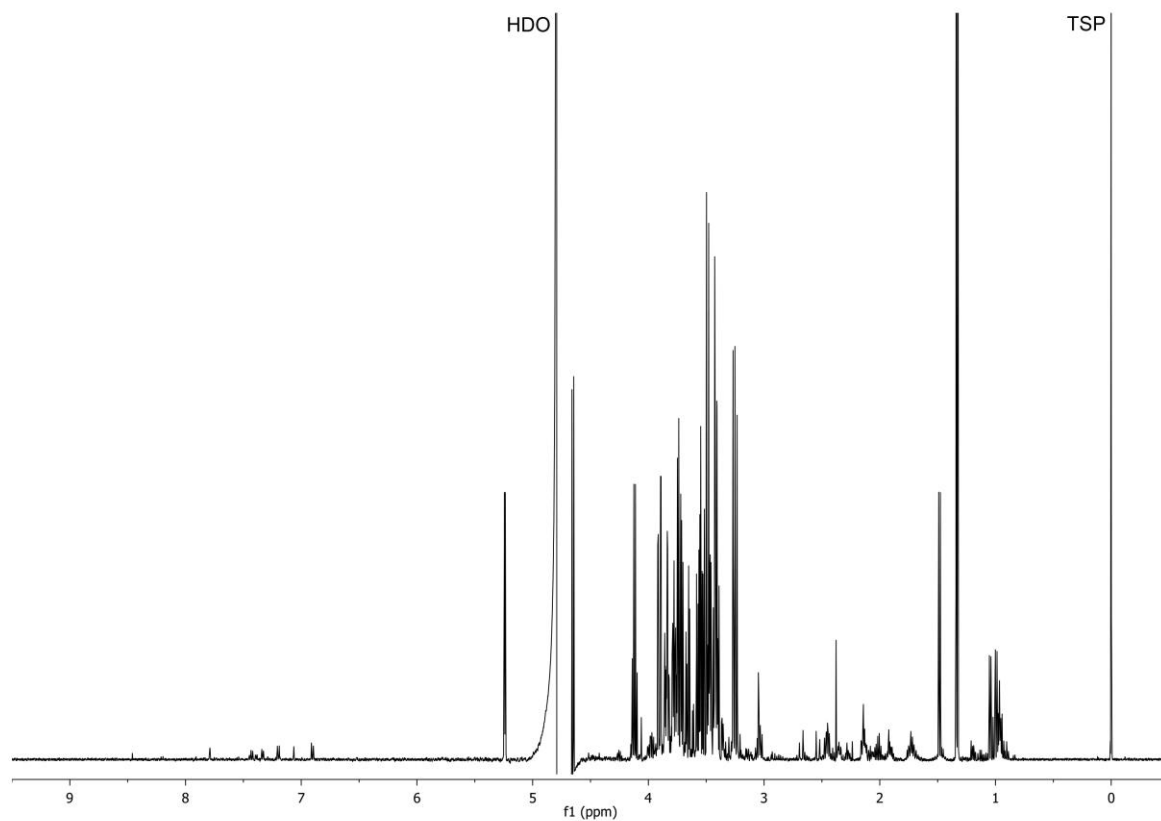

**Figure S2.**  $^1\text{H}$  NMR spectrum of a representative blood plasma sample.

**Table S2.** Adjusted *P*-values after Benjamini-Hochberg correction obtained from Wilcoxon test for EBC samples.

|                  | pre-shift vs HC* | post-shift vs HC* | pre-shift vs post-shift** |
|------------------|------------------|-------------------|---------------------------|
| Acetate          | 0.0880           | 0.1735            | 1.0000                    |
| Acetoin          | <b>0.0010</b>    | <b>0.0162</b>     | <b>0.0203</b>             |
| Acetone          | 0.0880           | <b>0.0162</b>     | 0.5404                    |
| Butyrate         | 0.2036           | 0.1735            | 0.6791                    |
| Dimethylamine    | 0.7331           | <b>0.0162</b>     | <b>0.0025</b>             |
| Ethanol          | 0.5021           | 0.4641            | 0.6138                    |
| Formate          | 0.1608           | 0.4232            | 0.6138                    |
| Glycerol         | 0.0586           | 0.2842            | 0.8725                    |
| Isobutyrate      | 0.8287           | 1.0000            | 0.6791                    |
| Isopropanol      | 0.1514           | <b>0.0162</b>     | 0.1074                    |
| Isovalerate      | 0.1998           | 0.2842            | 1.0000                    |
| Lactate          | <b>0.0418</b>    | 0.2842            | 0.6138                    |
| Methanol         | 0.0586           | 0.5463            | 0.5404                    |
| Propionate       | <b>0.0031</b>    | <b>0.0309</b>     | 0.3649                    |
| Propylene glycol | 0.7649           | 0.9560            | 0.8725                    |

\*Wilcoxon rank-sum test; \*\*Wilcoxon signed-rank test

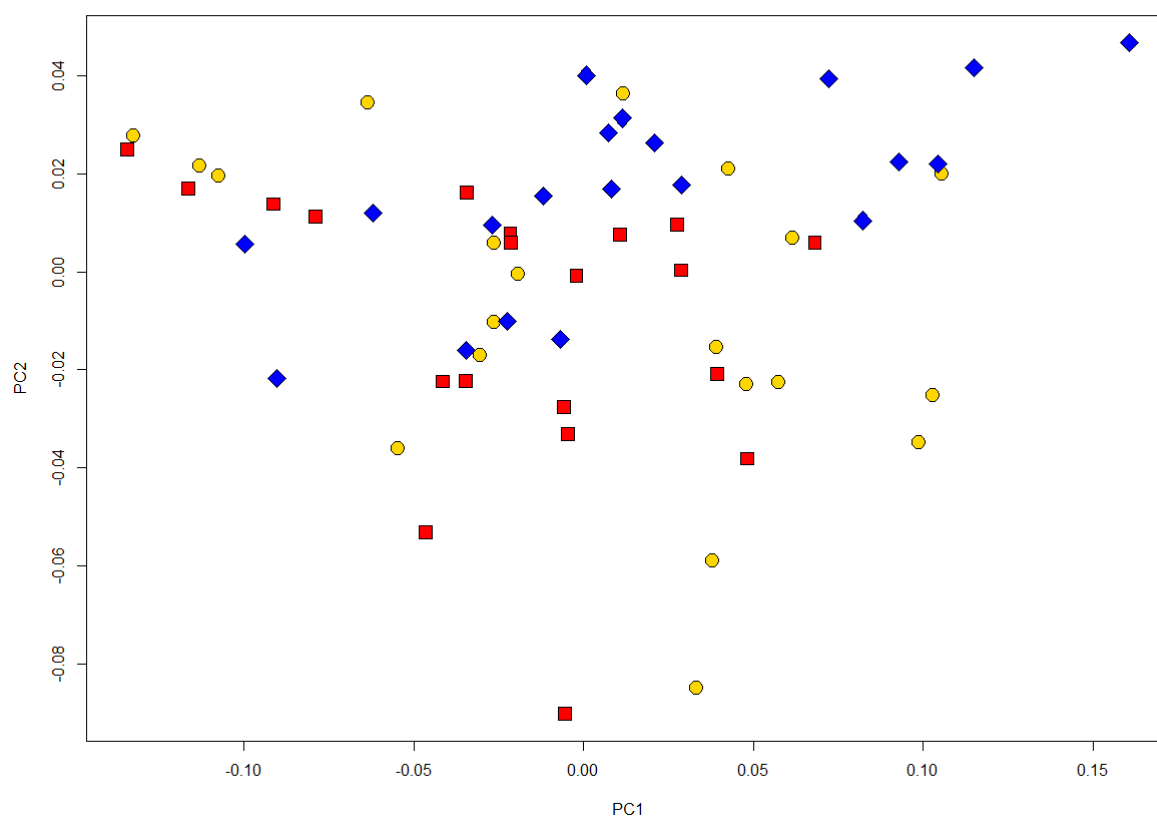

**Figure S3.** Principal component analysis for EBC samples; pre-shift subjects (yellow circles), post-shift subjects (red squares), and healthy controls (blue diamonds).

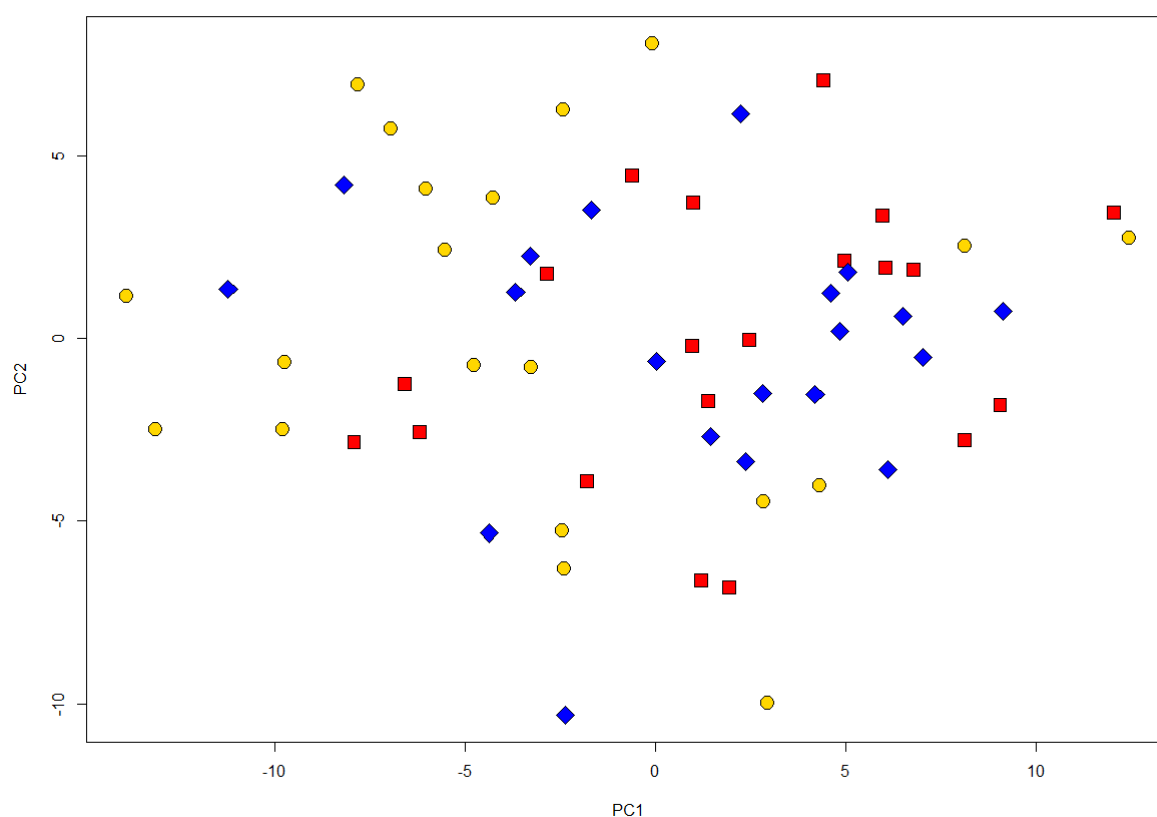

**Figure S4.** Principal component analysis for blood plasma samples; pre-shift subjects (yellow circles), post-shift subjects (red squares), and healthy controls (blue diamonds).

**Table S3.** Adjusted *P*-values after Benjamini-Hochberg correction obtained from Wilcoxon test for blood plasma samples.

|                        | pre-shift vs HC* | post-shift vs HC* | pre-shift vs post-shift** |
|------------------------|------------------|-------------------|---------------------------|
| 2-Hydroxybutyrate      | 0.5304           | 0.2657            | <b>0.0024</b>             |
| 2-Hydroxyisobutyrate   | 0.5304           | 0.4103            | 0.8581                    |
| 2-Hydroxyisovalerate   | 0.9148           | 0.8232            | 0.2688                    |
| 2-Oxoisocaproate       | 0.9712           | <b>0.0314</b>     | <b>0.0024</b>             |
| 3-Hydroxybutyrate      | 0.5775           | 0.1846            | <b>0.0024</b>             |
| 3-Hydroxyisovalerate   | 0.5304           | 0.2533            | 0.6905                    |
| 3-Methyl-2-oxovalerate | 1.0000           | 0.1764            | <b>0.0024</b>             |
| Acetate                | 0.5304           | 0.6726            | 0.7045                    |
| Acetoacetate           | 0.9850           | 0.8165            | 0.6747                    |
| Acetone                | <b>0.0060</b>    | <b>0.0314</b>     | 0.2112                    |
| Alanine                | 0.6113           | 0.4329            | 0.6747                    |
| Arginine               | 0.5304           | 0.7425            | 0.6744                    |
| Ascorbate              | 0.5621           | 0.5098            | 1.0000                    |
| Asparagine             | 0.8262           | 0.9893            | 0.7196                    |
| Betaine                | 0.4423           | 0.3703            | 0.9141                    |

|                      | pre-shift vs HC* | post-shift vs HC* | pre-shift vs post-shift** |
|----------------------|------------------|-------------------|---------------------------|
| Carnitine            | 0.5304           | 0.5652            | 0.7836                    |
| Citrate              | 0.6113           | 0.8097            | 0.3499                    |
| Creatine             | 0.8262           | 0.5652            | 0.1784                    |
| Creatinine           | 0.9850           | 0.6858            | 0.6747                    |
| Cystine              | <u>0.0652</u>    | 0.0812            | 0.9141                    |
| Dimethyl sulfone     | 0.8262           | 0.7425            | 0.2688                    |
| Dimethylamine        | 0.9148           | 0.6858            | 0.6747                    |
| Formate              | 0.6113           | 0.6726            | 0.5609                    |
| Glucose              | 0.5304           | 0.6072            | 0.1825                    |
| Glutamate            | <u>0.0512</u>    | <b>0.0372</b>     | 0.5015                    |
| Glutamine            | <u>0.0652</u>    | 0.1697            | 0.7196                    |
| Glycine              | 0.4803           | 0.4835            | 0.9141                    |
| Glycolate            | 0.8262           | 0.4103            | <b>0.0498</b>             |
| Histidine            | 0.5775           | 0.6072            | 0.7354                    |
| Hypoxanthine         | <u>0.0563</u>    | 0.6376            | 0.6747                    |
| Choline              | 0.8262           | 0.6726            | 0.8581                    |
| Isobutyrate          | 0.2182           | 0.6901            | <b>0.0119</b>             |
| Isoleucine           | 0.8262           | 0.8097            | 0.6600                    |
| Isopropanol          | 0.2256           | 0.6428            | <b>0.0123</b>             |
| Lactate              | 0.1496           | 0.6726            | <b>0.0128</b>             |
| Leucine              | 0.5621           | 0.6901            | 0.8581                    |
| Lysine               | 0.5621           | 0.4835            | 0.8581                    |
| Mannose              | 0.5652           | <b>0.0388</b>     | 0.1038                    |
| Methanol             | 0.8262           | 0.9417            | 0.7045                    |
| Methionine           | 0.9712           | 0.6483            | 0.4893                    |
| myo-Inositol         | 0.5304           | 0.6901            | <b>0.0324</b>             |
| N.N-Dimethylglycine  | 0.6113           | 0.7425            | 0.6747                    |
| O-Acetylcarnitine    | 0.5304           | <b>0.0388</b>     | 0.2444                    |
| Ornithine            | 0.6244           | 0.8809            | 0.3604                    |
| Phenylalanine        | 0.6244           | 0.6072            | 0.8581                    |
| Proline              | 0.8262           | 0.8869            | 0.7045                    |
| Propylene glycol     | 0.8262           | <b>0.0314</b>     | <b>0.0098</b>             |
| Pyruvate             | 0.2256           | <b>0.0314</b>     | 0.8581                    |
| Sarcosine            | 0.4938           | 0.3898            | 0.9141                    |
| Serine               | 0.6113           | 0.8097            | 0.6747                    |
| Succinate            | 0.9148           | 0.3559            | 0.2112                    |
| Threonine            | 0.9850           | 0.3703            | 0.2444                    |
| Trimethylamine       | 0.8262           | 0.8748            | 0.7196                    |
| Trimethylamine oxide | 0.6113           | 0.6901            | 0.6095                    |
| Tryptophan           | 0.5304           | 0.4801            | <b>0.0024</b>             |
| Tyrosine             | 0.5775           | 0.9146            | 0.2688                    |
| Urea                 | 0.8076           | 0.7425            | 0.8581                    |
| Valine               | 0.8262           | 0.6072            | 0.5476                    |

\*Wilcoxon rank-sum test; \*\*Wilcoxon signed-rank test

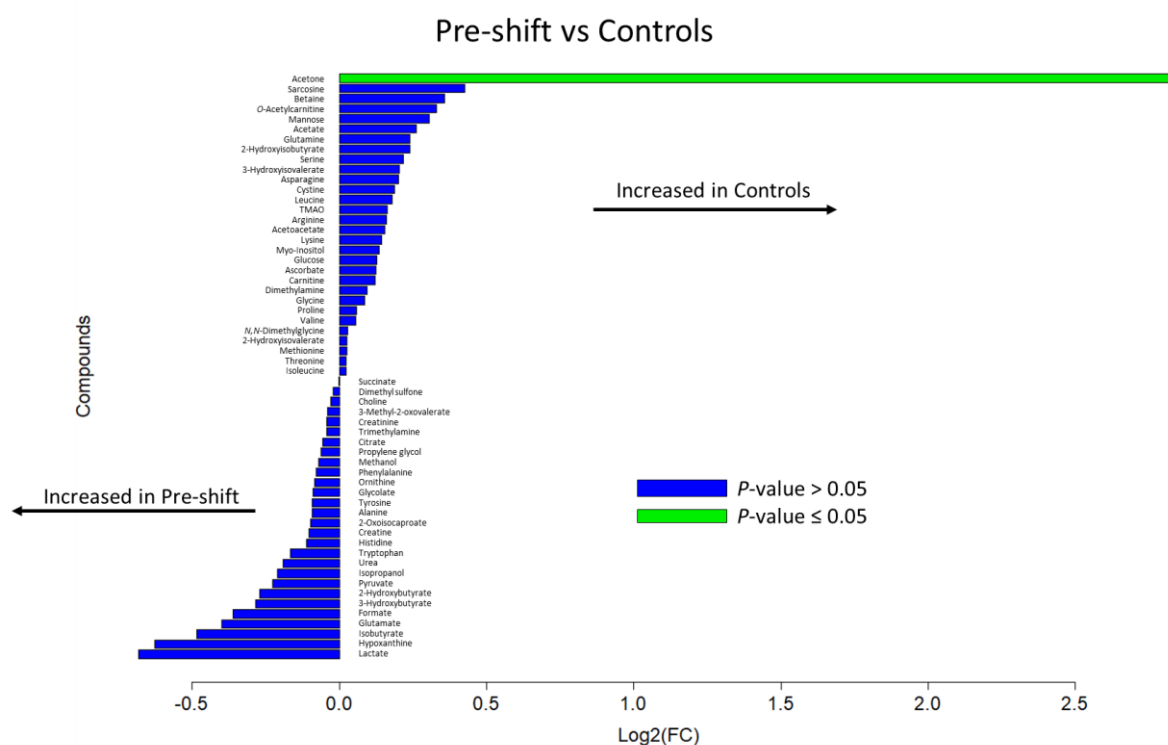

**Figure S5.** Fold change projection depicting differences in levels of individual metabolites observed in blood plasma samples between pre-shift subjects and healthy controls.

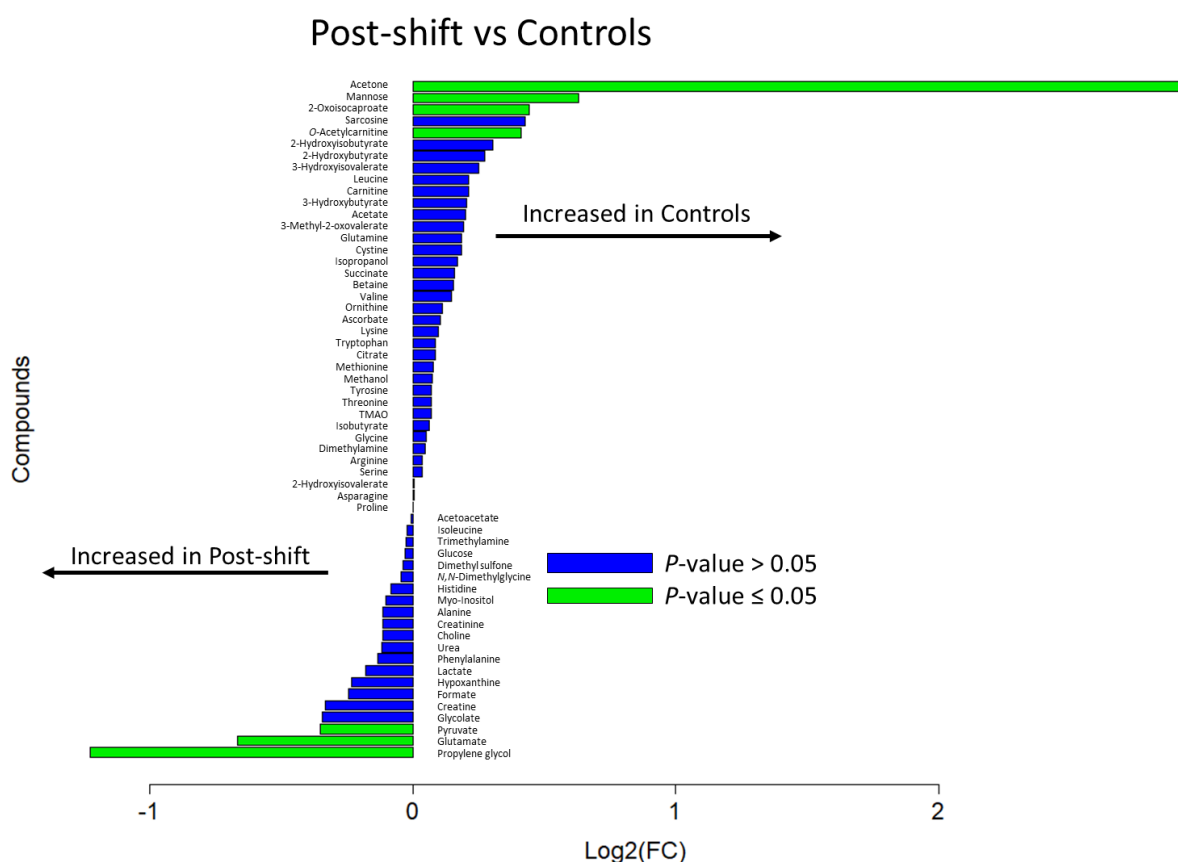

**Figure S6.** Fold change projection depicting differences in levels of individual metabolites observed in blood plasma samples between post-shift subjects and healthy controls.



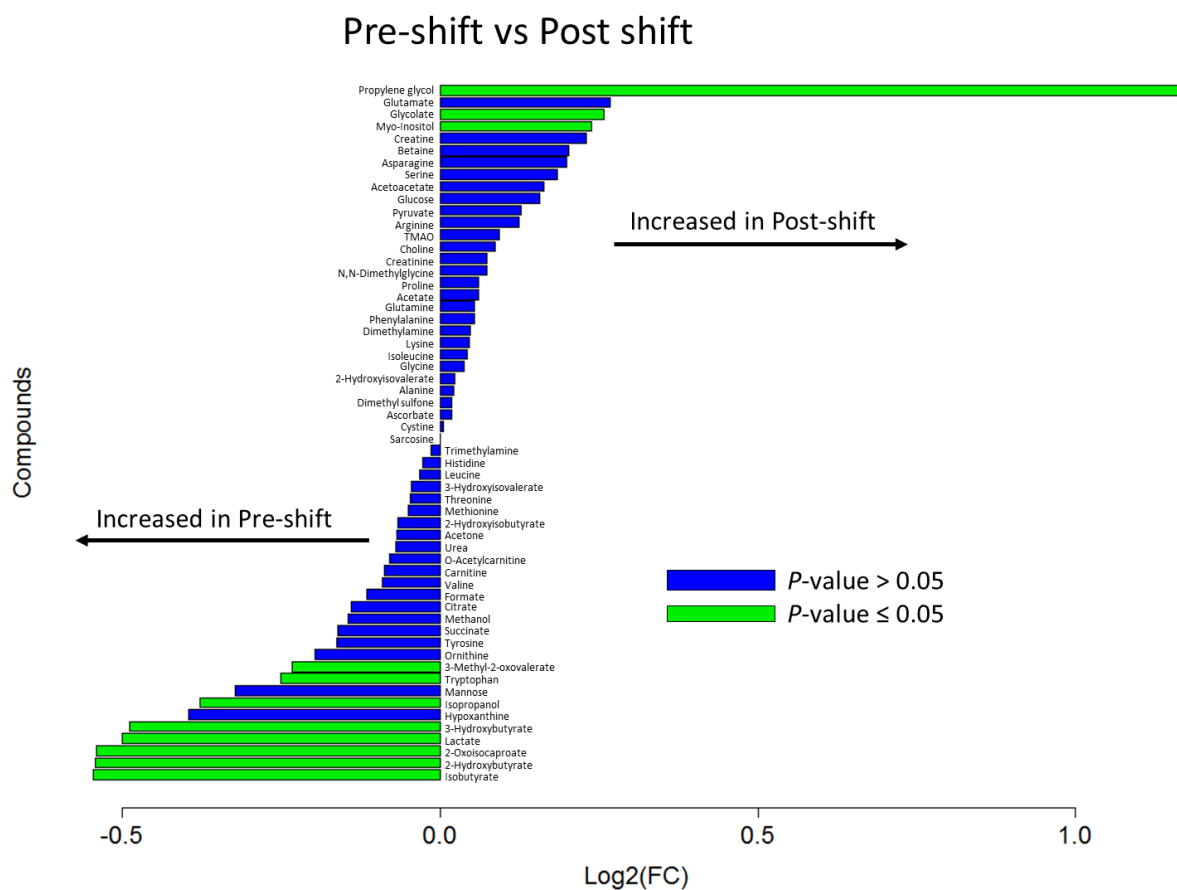

**Figure S7.** Fold change projection depicting differences in levels of individual metabolites observed in blood plasma samples between pre-shift subjects and post-shift subjects.

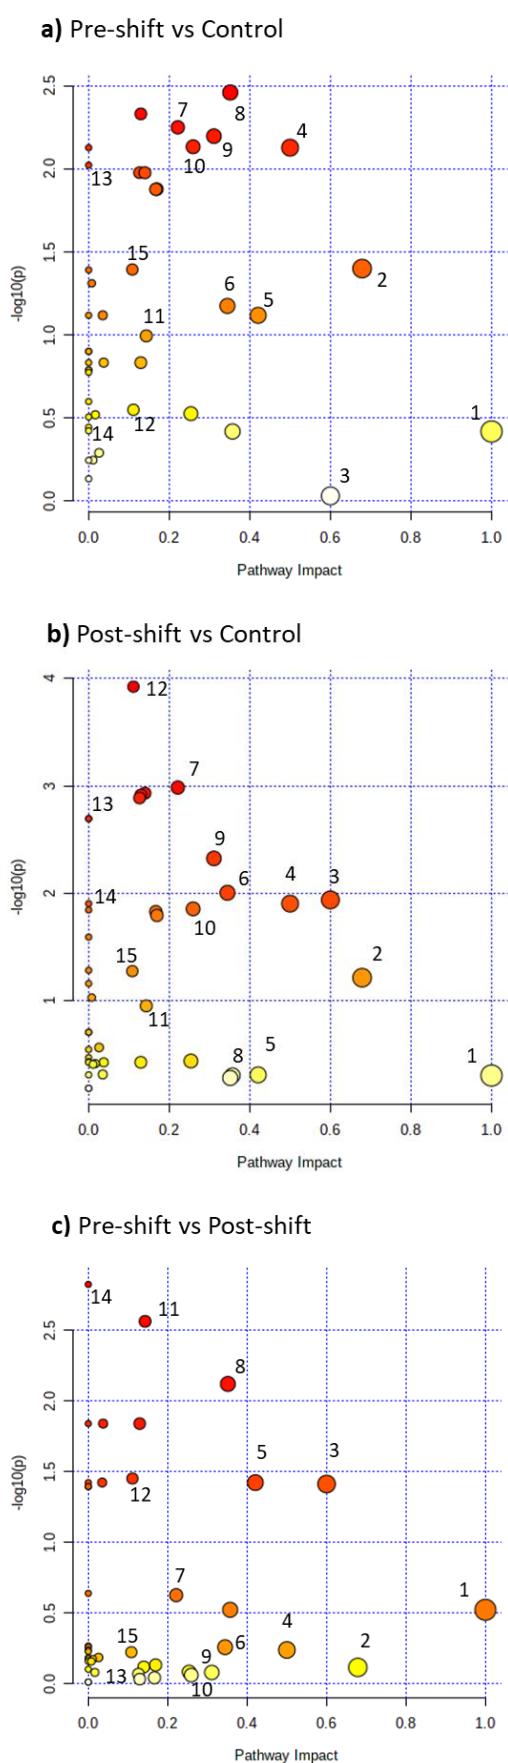

**Figure S8.** Metabolic pathway analysis of the group discrimination performed on plasma metabolic profiles. The legend to the pathway labelling is given in **Table S3**.

**Table S4.** Analysis of alteration of the most influenced metabolic pathways performed on plasma metabolic profiles; a) pre-shift vs control, b) post-shift vs control, c) pre-shift vs post-shift

| No. | Metabolic pathway                                    | -log <sub>10</sub> (p) |      |      |
|-----|------------------------------------------------------|------------------------|------|------|
|     |                                                      | a                      | b    | c    |
| 1   | Phenylalanine, tyrosine and tryptophane biosynthesis | 0.42                   | 0.30 | 0.52 |
| 2   | Glycine, serine and threonine metabolism             | 1.40                   | 1.2  | 0.12 |
| 3   | Synthesis and degradation of ketone bodies           | 0.03                   | 1.94 | 1.41 |
| 4   | D-glutamine and D-glutamate metabolism               | 2.13                   | 1.90 | 0.24 |
| 5   | Starch and sucrose metabolism                        | 1.12                   | 0.42 | 1.42 |
| 6   | Arginine and proline metabolism                      | 1.18                   | 2.00 | 0.26 |
| 7   | Histidine metabolism                                 | 2.25                   | 2.98 | 0.63 |
| 8   | Pyruvate metabolism                                  | 2.46                   | 0.27 | 2.12 |
| 9   | Alanine, aspartate and glutamate metabolism          | 2.20                   | 2.30 | 0.08 |
| 10  | Glyoxylate and dicarboxylate metabolism              | 2.13                   | 1.85 | 0.06 |
| 11  | Tryptophan metabolism                                | 0.99                   | 0.95 | 2.56 |
| 12  | Butanoate metabolism                                 | 0.55                   | 3.92 | 1.45 |
| 13  | Cysteine and methionine metabolism                   | 1.98                   | 2.89 | 0.07 |
| 14  | Propanoate metabolism                                | 0.42                   | 1.84 | 2.82 |
| 15  | Glutathione metabolism                               | 1.39                   | 1.27 | 0.23 |

**Table S5.** Adjusted *P*-values after Benjamini-Hochberg correction obtained from Wilcoxon test for EBC samples after exclusion of smoking subjects.

|                  | pre-shift vs HC* | post-shift vs HC* | pre-shift vs post-shift** |
|------------------|------------------|-------------------|---------------------------|
| Acetate          | 0.0511           | 0.1368            | 0.9563                    |
| Acetoin          | <b>0.0010</b>    | <b>0.0183</b>     | <b>0.0400</b>             |
| Acetone          | 0.1254           | <b>0.0183</b>     | 0.5165                    |
| Butyrate         | 0.2864           | 0.1368            | 0.9563                    |
| Dimethylamine    | 0.6485           | <b>0.0183</b>     | <b>0.0063</b>             |
| Ethanol          | 0.3729           | 0.4753            | 0.9563                    |
| Formate          | 0.1254           | 0.3108            | 0.8275                    |
| Glycerol         | 0.0557           | 0.1368            | 0.9653                    |
| Isobutyrate      | 0.6485           | 0.9420            | 0.9563                    |
| Isopropanol      | 0.1254           | <b>0.0183</b>     | 0.0618                    |
| Isovalerate      | 0.1872           | 0.3825            | 0.9653                    |
| Lactate          | 0.0511           | 0.3108            | 0.8006                    |
| Methanol         | 0.0511           | 0.4753            | 0.5165                    |
| Propionate       | <b>0.0062</b>    | <b>0.0183</b>     | 0.5165                    |
| Propylene glycol | 0.5446           | 0.9878            | 0.9563                    |

\*Wilcoxon rank-sum test; \*\*Wilcoxon signed-rank test

**Table S6.** Adjusted *P*-values after Benjamini-Hochberg correction obtained from Wilcoxon test for blood plasma samples after exclusion of smoking subjects.

|                        | pre-shift vs HC* | post-shift vs HC* | pre-shift vs post-shift** |
|------------------------|------------------|-------------------|---------------------------|
| 2-Hydroxybutyrate      | 0.5690           | 0.3136            | <b>0.0049</b>             |
| 2-Hydroxyisobutyrate   | 0.6298           | 0.6044            | 0.9217                    |
| 2-Hydroxyisovalerate   | 0.9570           | 0.9738            | 0.3572                    |
| 2-Oxoisocaproate       | 0.9570           | 0.0618            | <b>0.0039</b>             |
| 3-Hydroxybutyrate      | 0.6110           | 0.2206            | <b>0.0039</b>             |
| 3-Hydroxyisovalerate   | 0.3328           | 0.2206            | 0.8757                    |
| 3-Methyl-2-oxovalerate | 0.9570           | 0.2717            | <b>0.0039</b>             |
| Acetate                | 0.3555           | 0.5075            | 0.8032                    |
| Acetoacetate           | 0.9880           | 0.8908            | 0.7663                    |
| Acetone                | <b>0.0041</b>    | <b>0.0319</b>     | 0.2403                    |
| Alanine                | 0.5690           | 0.2538            | 0.6373                    |
| Arginine               | 0.5690           | 0.8180            | 0.7478                    |
| Ascorbate              | 0.5690           | 0.4623            | 0.9217                    |
| Asparagine             | 0.9570           | 0.9332            | 0.7294                    |
| Betaine                | 0.2851           | 0.2206            | 0.9217                    |
| Carnitine              | 0.3328           | 0.3160            | 0.8919                    |
| Citrate                | 0.6298           | 0.9332            | 0.4586                    |
| Creatine               | 0.6110           | 0.7704            | 0.2110                    |
| Creatinine             | 0.9880           | 0.7704            | 0.6373                    |
| Cystine                | 0.1306           | 0.1996            | 0.9217                    |
| Dimethyl sulfone       | 0.9880           | 0.7314            | 0.2983                    |

|                      | pre-shift vs HC* | post-shift vs HC* | pre-shift vs post-shift** |
|----------------------|------------------|-------------------|---------------------------|
| Dimethylamine        | 0.9880           | 0.8908            | 0.7110                    |
| Formate              | 0.7997           | 0.8908            | 0.4728                    |
| Glucose              | 0.4042           | 0.6044            | 0.1846                    |
| Glutamate            | 0.0563           | 0.0618            | 0.6305                    |
| Glutamine            | 0.0585           | 0.1143            | 0.8215                    |
| Glycine              | 0.5690           | 0.6254            | 0.9217                    |
| Glycolate            | 0.7039           | 0.2717            | 0.0874                    |
| Histidine            | 0.6298           | 0.7704            | 0.7110                    |
| Hypoxanthine         | <b>0.0333</b>    | 0.6110            | 0.6373                    |
| Choline              | 0.9570           | 0.7704            | 0.8919                    |
| Isobutyrate          | 0.2162           | 0.8908            | <b>0.0206</b>             |
| Isoleucine           | 0.9880           | 0.7704            | 0.6373                    |
| Isopropanol          | 0.2072           | 0.8180            | <b>0.0215</b>             |
| Lactate              | 0.0954           | 0.6928            | <b>0.0168</b>             |
| Leucine              | 0.6571           | 0.8908            | 0.9217                    |
| Lysine               | 0.5690           | 0.5075            | 0.9217                    |
| Mannose              | 0.5690           | 0.0585            | 0.1026                    |
| Methanol             | 0.9570           | 0.9810            | 0.7848                    |
| Methionine           | 0.9880           | 0.7704            | 0.6305                    |
| myo-Inositol         | 0.3328           | 0.8908            | <b>0.0266</b>             |
| N.N-Dimethylglycine  | 0.6387           | 0.8859            | 0.6373                    |
| O-Acetylcarnitine    | 0.2999           | <b>0.0319</b>     | 0.3461                    |
| Ornithine            | 0.6298           | 0.9663            | 0.4320                    |
| Phenylalanine        | 0.6571           | 0.6180            | 0.8919                    |
| Proline              | 0.6666           | 0.9332            | 0.6373                    |
| Propylene glycol     | 0.9728           | 0.0618            | <b>0.0168</b>             |
| Pyruvate             | 0.1273           | <b>0.0157</b>     | 0.9217                    |
| Sarcosine            | 0.3328           | 0.5075            | 0.9217                    |
| Serine               | 0.8992           | 0.9332            | 0.8397                    |
| Succinate            | 0.9728           | 0.3136            | 0.0742                    |
| Threonine            | 0.9880           | 0.5075            | 0.3461                    |
| Trimethylamine       | 0.6298           | 0.7704            | 0.8578                    |
| Trimethylamine oxide | 0.9880           | 1.0000            | 0.6305                    |
| Tryptophan           | 0.5690           | 0.4623            | <b>0.0039</b>             |
| Tyrosine             | 0.6298           | 0.9332            | 0.4450                    |
| Urea                 | 0.9570           | 0.8908            | 0.9217                    |
| Valine               | 0.9880           | 0.7704            | 0.6373                    |

\*Wilcoxon rank-sum test; \*\*Wilcoxon signed-rank test

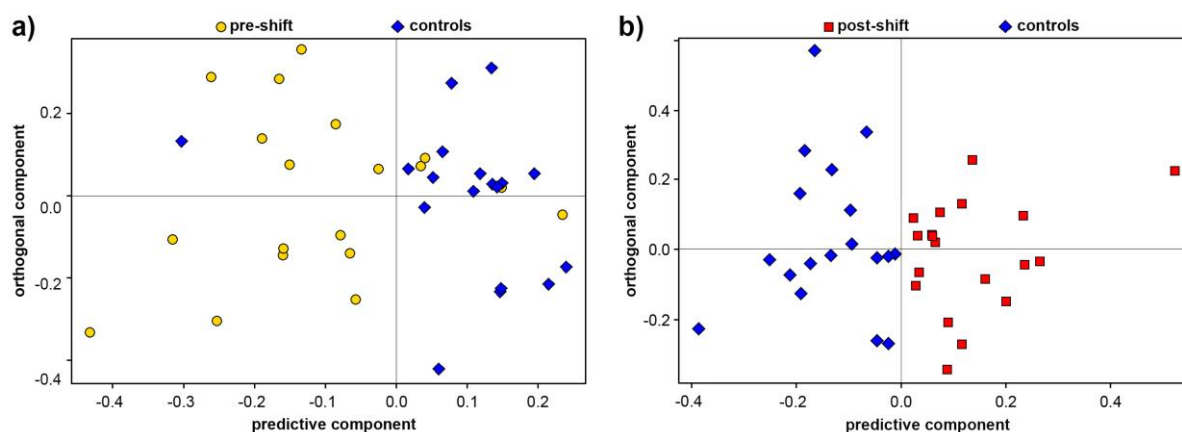

**Figure S9.** OPLS-DA of pre-shift subjects (yellow circles, 19) and healthy controls (blue diamonds, 18) using 320 bins from EBC samples after exclusion of smoking subjects; Acc. 89.7%, Sen. 82.8%, Spe. 97.0% (a). OPLS-DA of post-shift subjects (red squares, 19) and healthy controls (blue diamonds, 18) using 320 bins from EBC samples after exclusion of smoking subjects; Acc. 85.1%, Sen. 88.7%, Spe. 81.3% (b).

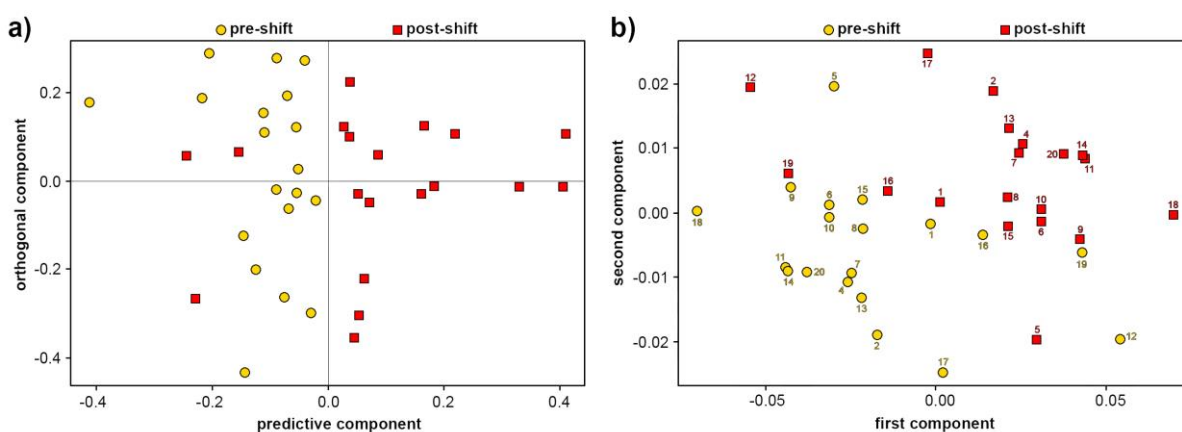

**Figure S10.** OPLS-DA of pre-shift (yellow circles, 19) and post-shift subjects (red squares, 19) after exclusion of smoking subjects; Acc. 79.6%, Sen. 81.2%, Spe. 78.0% (a). Multilevel partial least squares (mPLS) analysis of pre-shift (yellow circles, 19) and post-shift subjects (red squares, 19) after exclusion of smoking subjects; Acc. 80% (b). Both using 320 bins in each EBC sample.

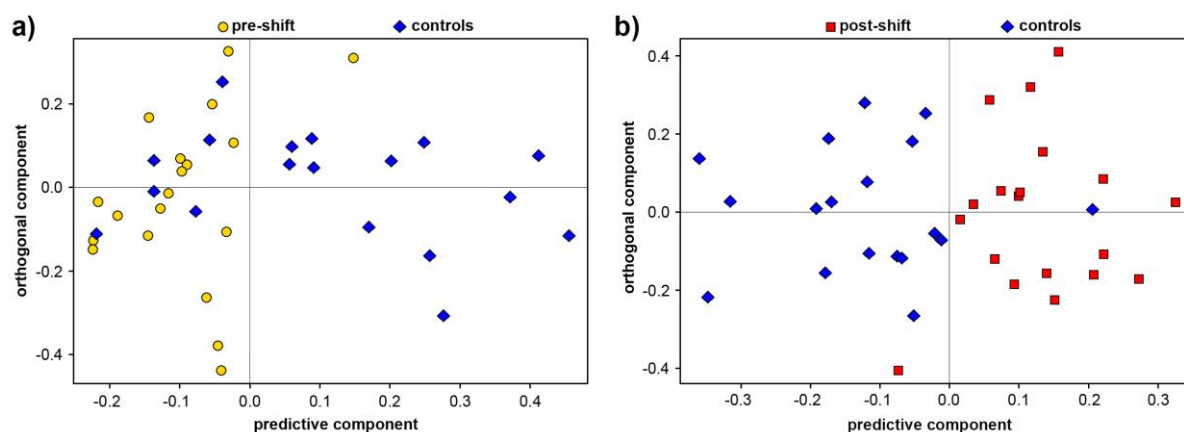

**Figure S11.** OPLS-DA of healthy controls (blue diamonds, 18) and pre-shift subjects (yellow circles, 19) after exclusion of smoking subjects; Acc. 80.6%, Sen. 90.4%, Spe. 70.2% (a). OPLS-DA of post-shift subjects (red squares, 19) and healthy controls (blue diamonds, 18) after exclusion of smoking subjects; Acc. 87.1%, Sen. 86.6%, Spe. 87.6% (b). Both using 58 normalized metabolites from blood plasma samples.

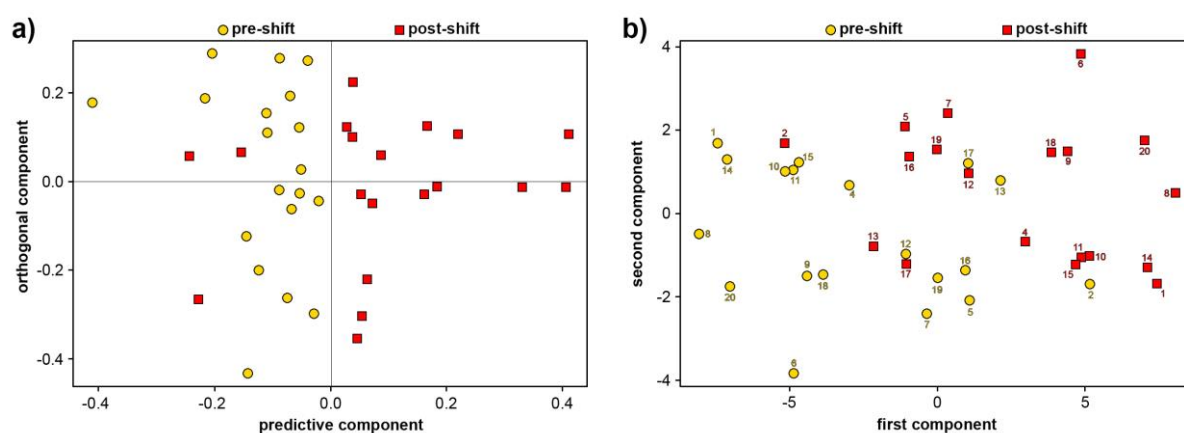

**Figure S12.** OPLS-DA of pre-shift (yellow circles, 19) and post-shift subjects (red squares, 19) after exclusion of smoking subjects; Acc. 76.3%, Sen. 81.5%, Spe. 71.2% (a). mPLS analysis of pre-shift (yellow circles, 19) and post-shift subjects (red squares, 19) after exclusion of smoking subjects; Acc. 88.5% (b). Both using 58 normalized metabolites from blood plasma samples.
